# Supplementary material
Source: PubMed Central journal article supplement (PMC4201835)

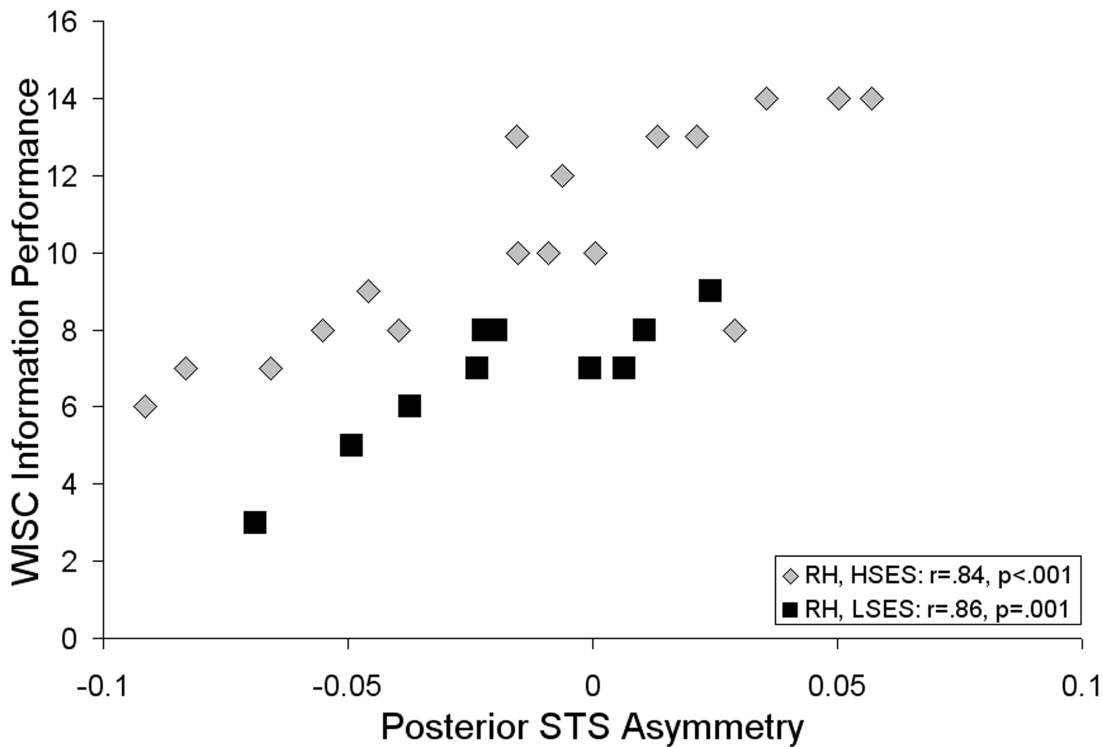

Supplement: NIHMS54708-supplement-02.pdf [file NIHMS54708-supplement-02.pdf]
